# Supplementary material
Source: PubMed Central journal article supplement (PMC7184913)
Supplement: jiy597_suppl_supplemental_figure_s1.pdf [file jiy597_suppl_supplemental_figure_s1.pdf]

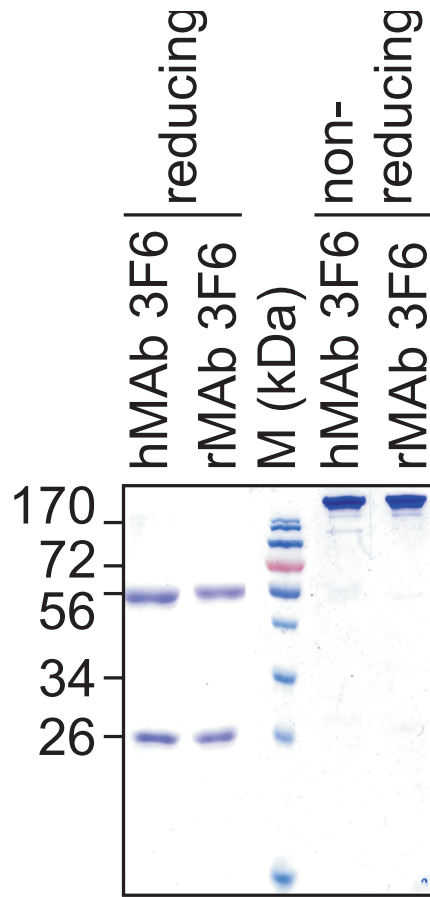

**Figure S1.** SDS-PAGE analysis of rMAb 3F6 and mouse hybridoma IgG2a antibody hMAb 3F6 under reducing (left) and non-reducing conditions (right). Molecular weight markers (M) were used to measure the mobility of antibody heavy and light chains.
