# Supplementary material
Source: PubMed Central journal article supplement (PMC7184913)
Supplement: jiy597_suppl_supplemental_figure_s2.pdf [file jiy597_suppl_supplemental_figure_s2.pdf]

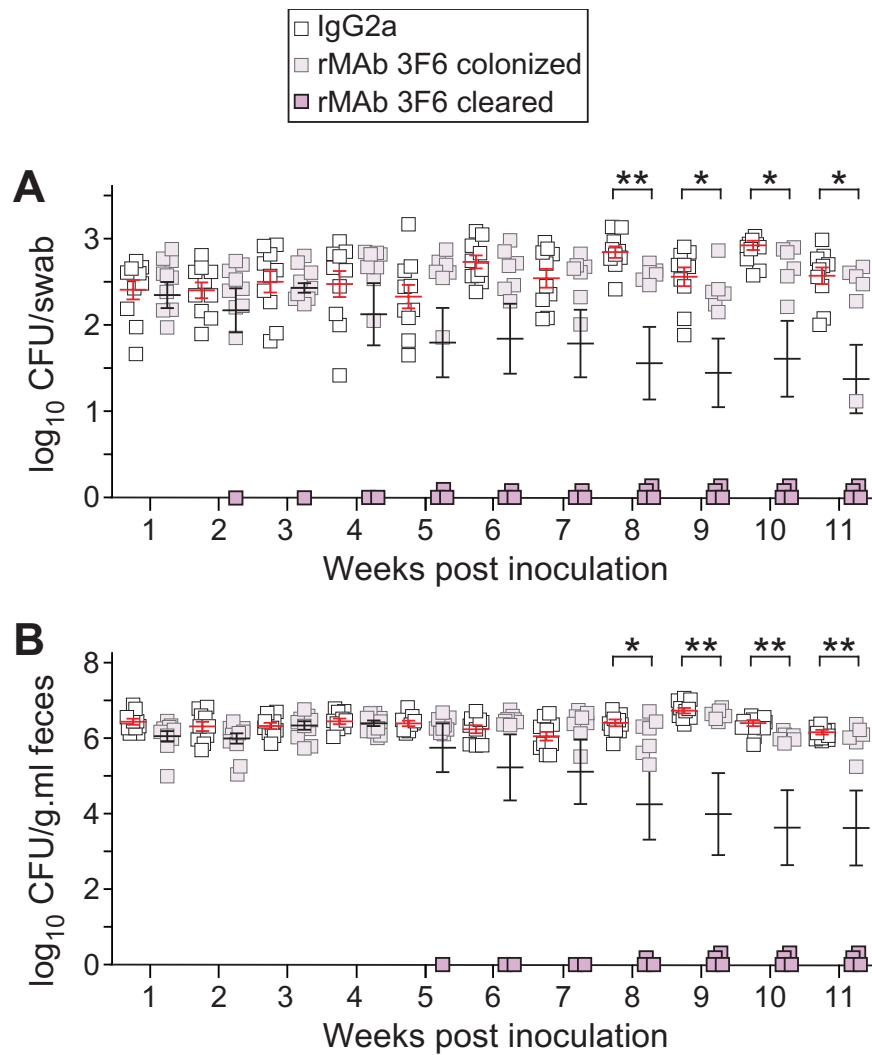

**Figure S2.** rMAb 3F6 administration promotes decolonization of *S. aureus* WU1 from (A) the oropharynx and (B) the intestinal tract of C57BL/6 mice. C57BL/6J mice (n= 10, 6 week-old animals) were inoculated intra-nasally with  $1 \times 10^8$  CFU of *S. aureus* WU1. On days 7, 21, 35, 49, 63 and 77 post inoculation, mice were administered 5 mg antibody/kg via intraperitoneal injection. (A) The oropharynx of animals was swabbed and (B) the fecal samples of mice were collected in weekly intervals and analyzed for staphylococcal load. The median CFU and standard deviation for each group of animals on a given day are indicated by the horizontal lines and error bars. \*,  $p < 0.05$ ; \*\*,  $p < 0.01$ .
